# Supplementary material for: Benchmarking the Learning Curve of Minimally Invasive Rectal Cancer Surgery Using Textbook Outcome: A Retrospective Analysis of Laparoscopic, Robotic, and Transanal Rectal Cancer Resections
Source: Research Square preprint supplement (doi:10.21203/rs.3.rs-8507148/v1), 2026-01-16
Supplement: Supplementary file 1 [file 9cdbdc21a0ed6b28cda2676f.docx]

**Table 1**. Patient characteristics

| **Characteristic** | **Total**  **(n=684)** | **Open**  **(n=153)** | **Laparoscopic**  **(n=341)** | **taTME**  **(n=55)** | **Robot**  **(n=135)** | **p-value** |
| --- | --- | --- | --- | --- | --- | --- |
| Sex, female, n (%)  Age, mean (SD)  BMI  n  mean (SD)  ASA, n (%)  n  0  1  2  3  4  CEA  mean (SD)  median (Q1-Q3)  StadII-V MR,n (%)  n  1  2  3  4  Analverge cm  mean (SD)  Tumor diameter  n  mean (SD)  Neoadjuvant, n (%) | 260 (38.0)  66.5 (11.6)  617  26.2 (4.6)  683  4 (0.6)  48 (7.0)  443 (64.9)  184 (26.9)  4 (0.6)  7.3 (18.8)  3.0(2.0-5.5)  681  182 (26.7)  286 (42.0)  166 (24.4)  47 (6.9)  8.4 (3.5)  683  4.3 (2.7)  185 (27.0) | 61 (39.9)  66.9 (11.7)  92  25.7 (4.4)  153  0  13 (8.5)  92 (60.1)  47 (30.7)  1 (0.7)  6.3 (14.7)  2.0(2.0-5.0)  152  40 (26.3)  48 (31.6)  43 (28.3)  21 (13.8)  7.9 (3.5)  153  4.2 (1.9)  50 (32.7) | 123 (36.1)  66.5 (11.2)  335  26.3 (4.6)  340  4 (1.2)  28 (8.2)  217 (63.8)  90 (26.5)  1 (0.3)  7.5 (19.6)  3.0(2.0-5.6)  340  96 (28.2)  151 (44.4)  80 (23.5)  13 (3.8)  8.7 (3.6)  341  4.4 (3.3)  82 (24.0) | 20 (36.4)  65.3 (13.6)  55  26.5 (4.1)  55  0  3 (5.5)  40 (72.7)  11 (20.0)  1 (1.8)  9.3 (21.0)  3.0(2.0-5.3  55  10 (18.2)  24 (43.6)  18 (32.7)  3 (5.5)  6.7 (1.9)  55  4.4 (1.8)  15 (27.3) | 56 (41.5)  66.2 (11.5)  135  26.5 (4.6)  135  0  4 (3.0)  94 (69.6)  36 (26.7)  1 (0.7)  6.9 (20.1)  2.6(1.6-5.9  134  36 (26.9)  63 (47.0)  25 (18.7)  10 (7.5)  8.8 (3.5)  134  4.0 (2.2)  38 (28.1) | 0.6771  0.8282  0.5852  0.3021  0.7712  0.0011  <0.0012  0.6381  0.2512 |

1χ2-test; 2ANOVA

**Table 2**. Intraoperative complications

| **Variable** | **Total**  **(n=684)** | **Open**  **(n=153)** | **Laparoscopic**  **(n=341)** | **taTME**  **(n=55)** | **Robot**  **(n=135)** | **p-value** |
| --- | --- | --- | --- | --- | --- | --- |
| **Operating time**  mean (SD)  median  (Q1-Q3)  **Surgery n (%)**  LAR  HAR  Anastomosis  Hartm  Amp  **Loop**Yes4  k/n (%)  **Intraoperative complications**  Bleeding  Inj. Vaginal wall  Urethra injury  Ureter injury  Vesica urin.injury  Spleen bleeding  Iatrog. inj small b  Per.op.anast.sut.  Convert.to APR  Tumor perf.  Rectum perf  Conv.open,surg.    **CassIntra grade**  > Grade II n (%) | 215.4 (72.3)  206  (164-259)  303 (44.3)  107 (15.6)  398 (58.2)  135 (19.7)  151 (22.1)  298/397 (75.1)  8  10  2  1  1  1  3  4  2  7  33  33  105 (15.4) | 208.2 (70.5)  197  (161-252)  63 (41.2)  18 (11.8)  81 (53)  30 (19.6)  42 (27.5)  65/82 (79.3)  5  3  0  0  0  0  0  0  0  2  6  0  16 (10.5) | 211.3 (72.4)  203  (157-250)  125 (36.7)  68 (19.9)  193 (56.6)  71 (20.8)  77 (22.6)  127/192 (66.1)  3  5  0  1  0  0  2  2  2  4  18  29  65 (19.1) | 277.6 (77.0)  270  (222-318)  55 (100)  0  43 (78.2)  12 (22.2)  0  42/42 (100)  0  1  2  0  0  0  0  0  0  0  3  2  11 (20.0) | 208.7 (60.0)  196  (170-259)  60 (44.4)  21 (15.6)  81 (60)  22 (16.3)  32 (23.7)  64/81 (79.0)    0  1  0  0  1  1  1  1  0  1  6  2    13 (9.6) | <0.0012  <0.0013  <0.0011  <0.0011  0.0131 |

1 χ 2-test, 2ANOVA,3Independent-samples median test

**Table 3**. Postoperative complications

| **Variable** | **Total**  **(n=684)** | **Open**  **(n=153)** | **Laparoscopic**  **(n=341)** | **taTME**  **(n=55)** | **Robot**  **(n=135)** | | **p-value** |
| --- | --- | --- | --- | --- | --- | --- | --- |
| **LOS (days)**  mean (SD)  median (Q1-Q3)  >14 days  ≤14 days    **Readmission**  30 days n (%)  No readm. 30 d  **Post operative complications**  Anastomosis leak  Blow out  Presacral abscess  Iatr.bowel perf.  Reop bleeding  Colon necrosis  Reop(negative)  Bladder injury  Wound rupture  Post op ileus  Stoma necrosis  Wound infections  Perf. Ulc. duodeni  Lapsc port hernia  Myocard.infarct  Aspiration  **Clavien Dindo**  n (%)  ≥III  0 | 9.6 (9.2)  7.0 (5.0-10.8)  87 (12.7)  596 (87.3)  138 (20.2)  546 (79.8)  33  15  39  4  6  6  4  3  7  7  5  7  2  1  1  1  141 (20.7)  540 (79.3) | 12.3 (13.2)  9.0 (7.0-13.0)  28 (18.3)  125 (81.7)  29 (19.0)  124 (81.0)  5  3  9  1  3  1  0  0  5  0  1  3  0  0  0  0  31 (20.3)  122 (79.7) | 8.7 (7.9)  7.0 (5.0-9.0)  36 (10.6)  305 (89.4)  59 (17.3)  282 (82.7)  18  8  14  2  3  3  3  1  1  4  2  4  1  0  0  1  65 (19.1)  276 (80.9) | 8.0 (7.4)  8.0 (6.0-12.0)  10 (18.2)  45 (81.8)  12 (21.8)  43 (78.2)  5  2  1  0  0  0  1  1  0  1  0  0  1  0  1  0  13 (23.6)  42 (76.4) | 8.5 (6.4)  6.0(5.0-10.0)  13 (9.6)  122 (90.4)  38 (28.1)  97 (71.9)  5  2  15  1  0  2  0  1  1  2  2  0  0  1  0  0  32 (24.2)  100 (75.8) | <0.0012  <0.0013  0.0391  0.0631  0.5991 | |

1χ2-test; 2ANOVA; 3Independent-samples median test

**Table 4**. Oncological outcomes

| **Variable** | **Total**  **(n=684)** | **Open**  **(n=153)** | **Laparoscopic**  **(n=341)** | **taTME**  **(n=55** | **Robot**  **(n=135)** | **p-value**1 |
| --- | --- | --- | --- | --- | --- | --- |
| **CRM tumor ≤1mm**  **n (%)**  >1 mm  ≤1 mm  **Malign LN CRM ≤1mm**  **n (%)**  >1 mm  ≤1 mm  **Tumor deposit CRM ≤1mm**  **n (%)**  >1 mm  ≤1 mm  **Distance CRM**  **n (%)**  ≤1 mm  >1 mm  **Quirke**  **n (%)**  1  2-3  **Distal resection margin n (%)**  ≤1mm  >1mm  **No of lymph nodes,**  **n (%)**  ≤12  >12 | 650 (95.0)  34 (5.0)  650 (95.0)  34 (5.0)  672 (98.2)  12 (1.8)  80 (11.7)  606 (88.6)  92 (14.3)  552 (85.7)  2 (0.3)  682 (99.7)  76 (11.1)  608 (88.9) | 142 (92.8)  11 (7.2)  145 (94.8)  8 (5.2)  149 (97.4)  4 (2.6)  23 (15.0)  130 (85.0)  21 (15.4)  115 (84.6)  0  153 (100)  29 (19.0)  124 (81.0) | 332 (97.2)  9 (2.3)  324 (95.0)  17 (5.0)  335 (98.2)  6 (1.8)  31 (9.1)  310 (90.9)  39 (12.1)  282 (87.9)  0  341 (100)  27 (7.9)  314 (92.1) | 51 (92.7)  4 (7.3)  49 (89.1)  6 (10.9)  53 (96.4)  2 (3.6)  12 (21.8)  43 (78.2)  17 (32.7)  35 (67.3)  1 (1.8)  54 (98.2)  4 (7.3)  51 (92.7) | 125 (92.6)  10 (7.4)  132 (97.8)  3 (2.2)  135 (100)  0  12 (8.9)  123 (91.1)  15 (11.1)  120 (88.9)  1 (0.7)  134 (99.3)  16 (11.9)  119 (88.1) | 0.050  0.098  0.241  0.014  <0.001  0.080  0.003 |

1χ2-test

**Table 5**. Results of linear1/logistic2 regression analyses for trend in groups based on operation type

|  | **Sum score**1 | | **Operation time**2 | | **Perioperative complications** 2 | | **Postoperative compl.ications**2 | | **Oncological complications**2 | |
| --- | --- | --- | --- | --- | --- | --- | --- | --- | --- | --- |
| RC (SE) | p-value | RC (SE) | p-value | RC (SE) | p-value | RC (SE) | p-value | RC (SE) | p-value |
| Constant | 6.75 (0.26) | <0.001 | 1.50 (0.84) | 0.074 | 2.40 (0.68) | <0.001 | 0.74 (0.43) | 0.086 | 0.24 (0.42) | 0.572 |
| Time | -0.02 (0.17) | 0.922 | -0.33 (0.82) | 0.688 | -0.19 (0.42) | 0.652 | -0.04 (0.27) | 0.652 | 0.09 (0.27) | 0.749 |
| Time2 | 0.002 (0.02) | 0.888 | 0.11 (0.17) | 0.508 | 0.02 (0.04) | 0.635 | -0.003 (0.03) | 0.635 | 0.0001 (0.03) | 0.997 |
| **Operation** |  |  |  |  |  |  |  |  |  |  |
| Open – ref. | 0 |  | 0 |  | 0 |  | 0 |  | 0 |  |
| Lapar. | 0.08 (0.43) | 0.858 | -0.25 (1.07) | 0.813 | -0.97 (0.97) | 0.315 | 0.03 (0.73) | 0.315 | 1.45 (0.79) | 0.064 |
| taTME | -5.09 (1.37) | **<0.001** | -7.73 (3.33) | **0.029** | -2.05 (2.65) | 0.441 | -8.26 (3.74) | 0.441 | -4.62 (2.82) | 0.101 |
| Robot | 0.69 (0.89) | 0.438 | -0.56 (1.78) | 0.754 | 3.58 (3.98) | 0.368 | 1.20 (1.52) | 0.368 | -0.10 (1.52) | 0.946 |
| **Time x Operation** |  |  |  |  |  |  |  |  |  |  |
| Time x Open | 0 |  | 0 |  | 0 |  | 0 |  | 0 |  |
| Time x Lapar. | -0.09 (0.22) | 0.680 | 0.09 (0.87) | 0.916 | 0.08 (0.52) | 0.873 | 0.01 (0.37) | 0.873 | -0.53 (0.40) | 0.180 |
| Time x taTME | 3.31 (1.09) | **0.002** | 4.71 (2.62) | 0.072 | 1.26 (2.14) | 0.556 | 5.82 (2.74) | 0.556 | 2.96 (2.10) | 0.159 |
| Time x Robot | -0.55 (0.67) | 0.417 | -0.44 (1.59) | 0.783 | -2.13 (2.67) | 0.424 | -1.12 (1.13) | 0.424 | 0.69 (1.17) | 0.553 |
| **TimextimeOperation** |  |  |  |  |  |  |  |  |  |  |
| Time x Time x Open | 0 |  | 0 |  | 0 |  | 0 |  | 0 |  |
| Time x Time x Lapar. | 0.02 (0.02) | 0.422 | -0.06 (0.17) | 0.707 | -0.0003 (0.05) | 0.995 | 0.01 (0.04) | 0.995 | 0.06 (0.04) | 0.154 |
| Time x Time x taTME | -0.55 (0.20) | **0.006** | -0.81 (0.45) | 0.074 | -0.25 (0.38) | 0.524 | -0.95 (0.46) | 0.524 | -0.50 (0.36) | 0.173 |
| Time x Time x Robot | 0.11 (0.12) | 0.384 | 0.21 (0.33) | 0.529 | 0.32 (0.44) | 0.468 | 0.20 (0.20) | 0.468 | -0.15 (0.21) | 0.477 |

RC=regression coefficient, SE=standard error
