# Supplementary material for: Benchmarking the Learning Curve of Minimally Invasive Rectal Cancer Surgery Using Textbook Outcome: A Retrospective Analysis of Laparoscopic, Robotic, and Transanal Rectal Cancer Resections
Source: Research Square preprint supplement (doi:10.21203/rs.3.rs-8507148/v1), 2026-01-16
Supplement: Supplementary file 2 [file fbe4cb5d7400155901237ef8.docx]

**Supplemental Table 1**. Overview of years included in analyses

| Year | Open  (n=153) | Laparoscopic  (n=341) | taTME  (n=54) | Robot  (n=135) |
| --- | --- | --- | --- | --- |
| 2014  2015  2016  2017  2018  2019  2020  2021  2022  2023  2024 | 72  40  17  10  4  1  0  1  3  2  3 | 1  15  28  41  31  58  54  47  46  20  - | -  5  9  14  26  -  -  -  -  -  - | -  -  -  -  -  -  -  11  22  67  35 |
| Year | Time scale in figures below | | | |
| 2014  2015  2016  2017  2018  2019  2020  2021  2022  2023  2024 | 1  2  3  4  5  6  7  8  9  10  11 | 1  2  3  4  5  6  7  8  9 | 1  2  3  4 | 1  2  3  4 |
